# Supplementary material
Source: HighWire-hosted journal article supplement (https://erj.ersjournals.com/content/54/4/1900949)
Supplement: inline-supplementary-material-1 [file inline-supplementary-material-1.pdf]

## **Patterns of systemic and local inflammation in patients with asthma hospitalised with influenza**

Akhilesh Jha, Jake Dunning, Tanushree Tunstall, Ryan S. Thwaites, Long T. Hoang, The MOSAIC Investigators, Onn Min Kon, Maria C. Zambon, Trevor T. Hansel, Peter J. Openshaw

### **Supplemental Information**

**Table E1** | Multivariate logistic regression model of covariates associated with severe outcome

**Table E2** | Serum cytokines and chemokines measured within 24 hours of admission

**Table E3** | Nasal cytokines and chemokines measured within 24 hours of admission

**Table E4** | Nasopharyngeal cytokines and chemokines measured within 24 hours of admission

**Figure E1** | Serum level of CRP measured within 24 hours of admission

**Figure E2** | Scatterplots of serum mediators differentiated by day of illness (DOI)

**Figure E3** | Scatterplots of nasal mediators differentiated by day of illness (DOI)

**Figure E4** | Scatterplots of nasopharyngeal mediators differentiated by day of illness (DOI)

**Figure E5** | Expression of eosinophil associated genes in subjects with and without asthma

**Table E1 | Multivariate logistic regression model of covariates associated with severe outcome**

| <b>Outcome: Death or respiratory failure requiring invasive ventilation</b> | <b>P-value</b> | <b>Adjusted OR</b> | <b>95% CI</b>    |
|-----------------------------------------------------------------------------|----------------|--------------------|------------------|
| Asthma Present                                                              | 0.0521         | 0.2947             | 0.0790 - 0.9537  |
| Gender (female as reference)                                                | 0.2862         | 1.6550             | 0.6611 - 4.2674  |
| Age (18-30 years as reference)                                              |                |                    |                  |
| Age 31-40                                                                   | 0.8939         | 1.0944             | 0.2847 - 4.1500  |
| Age 41-50                                                                   | 0.6043         | 1.3669             | 0.4215 - 4.5728  |
| Age >50                                                                     | 0.0818         | 3.1190             | 0.8890 - 11.7696 |
| Admission >4 days                                                           | 0.0001         | 5.9084             | 2.4540 - 15.4449 |
| Seasonal flu vaccination                                                    | 0.1342         | 0.4002             | 0.1120 - 1.2664  |
| Inhaled corticosteroid use                                                  | 0.2068         | 0.3573             | 0.0621 - 1.6321  |
| Oral/I.V. corticosteroids                                                   | 0.0154         | 3.4629             | 1.3036 - 9.9038  |
| n=133                                                                       |                |                    |                  |

**Table E2 | Serum cytokines and chemokines measured within 24 hours of admission**

| Cytokine or chemokine    | Median HC<br>(n=36) | Median A<br>(n=40) | Median NA<br>(n=93) | Dunn's test with Bonferroni correction; <i>P</i> -value |               |               |
|--------------------------|---------------------|--------------------|---------------------|---------------------------------------------------------|---------------|---------------|
|                          |                     |                    |                     | A vs NA                                                 | A vs HC       | NA vs HC      |
| IFN- $\alpha$ 2 $\alpha$ | 5.31                | 8.08               | 5.07                | <b>0.0099</b>                                           | <b>0.0452</b> | 1.000         |
| IFN- $\beta$             | 11.67               | 11.67              | 11.67               | 1.000                                                   | <b>0.0042</b> | <b>0.0021</b> |
| IFN- $\gamma$            | 0.32                | 1.38               | 2.32                | 0.1256                                                  | 0.0806        | <b>0.0001</b> |
| IFN - $\lambda$ /IL-29   | 26.84               | 12.01              | 12.01               | 1.0000                                                  | 0.3816        | 0.1327        |
| TNF- $\alpha$            | 5.17                | 4.67               | 6.64                | <b>0.0000</b>                                           | 0.5235        | <b>0.0015</b> |
| GMCSF                    | 1.06                | 0.29               | 0.76                | 0.4591                                                  | 0.8004        | 1.0000        |
| IL-1 $\beta$             | 0.78                | 0.33               | 0.33                | 0.2631                                                  | 1.0000        | 0.3032        |
| IL-2                     | 4.70                | 5.09               | 6.23                | 0.0906                                                  | 1.0000        | 0.2109        |
| IL-4                     | 1.66                | 0.90               | 1.02                | 1.0000                                                  | <b>0.0038</b> | <b>0.0011</b> |
| IL-5                     | 1.06                | 0.77               | 1.42                | <b>0.0010</b>                                           | 0.2020        | 0.1791        |
| IL-6                     | 3.78                | 9.98               | 38.81               | <b>0.0005</b>                                           | <b>0.0004</b> | <b>0.0000</b> |
| IL-10                    | 1.48                | 4.59               | 7.49                | <b>0.0411</b>                                           | <b>0.0001</b> | <b>0.0000</b> |
| IL-12p70                 | 3.99                | 1.75               | 1.98                | 0.8897                                                  | <b>0.0145</b> | <b>0.0177</b> |
| IL-13                    | 1.22                | 2.64               | 2.91                | 0.3131                                                  | <b>0.0004</b> | <b>0.0000</b> |
| IL-15                    | 1.63                | 3.71               | 4.81                | 0.1809                                                  | <b>0.0000</b> | <b>0.0000</b> |
| IL-17                    | 3.20                | 5.56               | 7.58                | <b>0.0197</b>                                           | <b>0.0003</b> | <b>0.0000</b> |
| CCL2/ MCP-1              | 415.82              | 435.19             | 595.56              | <b>0.0038</b>                                           | 1.0000        | <b>0.0027</b> |
| CCL3/ MIP-1 $\alpha$     | 10.99               | 13.49              | 13.69               | 1.0000                                                  | <b>0.0725</b> | <b>0.0166</b> |
| CCL4/ MIP-1 $\beta$      | 165.28              | 125.66             | 133.52              | 0.7915                                                  | <b>0.0179</b> | <b>0.0291</b> |
| CCL11/ Eotaxin           | 1250.70             | 547.81             | 621.48              | 1.0000                                                  | <b>0.0002</b> | <b>0.0000</b> |
| CCL13/ MCP-4             | 640.96              | 357.80             | 394.07              | 0.8654                                                  | <b>0.0017</b> | <b>0.0016</b> |
| CCL17/ TARC              | 412.83              | 263.25             | 240.04              | 1.0000                                                  | <b>0.0020</b> | <b>0.0007</b> |
| CCL22/ MDC               | 4010.90             | 1381.39            | 1739.56             | 0.5969                                                  | <b>0.0000</b> | <b>0.0000</b> |
| CCL26/ Eotaxin-3         | 2.51                | 15.75              | 18.36               | 0.8089                                                  | <b>0.0000</b> | <b>0.0000</b> |
| CXCL8/ IL-8              | 7.61                | 10.99              | 25.78               | <b>0.0000</b>                                           | 0.0643        | <b>0.0000</b> |
| CXCL9/ MIG               | 44.64               | 68.72              | 114.22              | <b>0.0031</b>                                           | <b>0.0016</b> | <b>0.0000</b> |
| CXCL10/ IP-10            | 167.09              | 721.01             | 1409.26             | 0.0546                                                  | <b>0.0000</b> | <b>0.0000</b> |
| CXCL11/ ITAC             | 60.98               | 187.57             | 277.71              | 0.2949                                                  | <b>0.0000</b> | <b>0.0000</b> |

HC=Healthy control; A=Asthma; NA=No Asthma

**Table E3 | Nasal cytokines and chemokines measured within 24 hours of admission**

| Cytokine or chemokine  | Median HC<br>(n=36) | Median A<br>(n=40) | Median NA<br>(n=93) | Dunn's test with Bonferroni correction; <i>P</i> -value |               |               |
|------------------------|---------------------|--------------------|---------------------|---------------------------------------------------------|---------------|---------------|
|                        |                     |                    |                     | A vs NA                                                 | A vs HC       | NA vs HC      |
| IFN- $\alpha$ 2a       | 1.31                | 1.31               | 1.31                | 1.0000                                                  | <b>0.0000</b> | <b>0.0000</b> |
| IFN- $\beta$           | 66.05               | 41.02              | 49.52               | 0.7356                                                  | 0.0604        | 0.1247        |
| IFN- $\gamma$          | 0.32                | 1.36               | 1.60                | 1.0000                                                  | <b>0.0496</b> | <b>0.0495</b> |
| IFN- $\lambda$ (IL-29) | 12.01               | 12.01              | 12.01               | 1.0000                                                  | <b>0.0000</b> | <b>0.0000</b> |
| TNF- $\alpha$          | 1.31                | 1.83               | 3.86                | 0.0674                                                  | <b>0.0312</b> | <b>0.0000</b> |
| GMCSF                  | 1.17                | 1.63               | 1.58                | 0.7172                                                  | 0.1926        | 0.0208        |
| IL-1 $\beta$           | 31.11               | 28.03              | 25.36               | 1.0000                                                  | 0.9505        | 1.0000        |
| IL-2                   | 1.93                | 2.47               | 3.49                | 0.7123                                                  | 1.0000        | 0.8696        |
| IL-4                   | 0.40                | 0.40               | 0.40                | 0.2432                                                  | <b>0.0000</b> | <b>0.0000</b> |
| IL-5                   | 1.04                | 0.65               | 0.95                | 0.7025                                                  | 0.2192        | 0.4762        |
| IL-6                   | 12.26               | 54.78              | 125.68              | 0.4013                                                  | <b>0.0000</b> | <b>0.0000</b> |
| IL-10                  | 0.78                | 1.58               | 1.99                | 1.0000                                                  | <b>0.0041</b> | <b>0.0001</b> |
| IL-12p70               | 1.51                | 1.12               | 1.45                | 0.3472                                                  | 0.3515        | 1.0000        |
| IL-13                  | 0.76                | 3.09               | 2.33                | 0.1510                                                  | <b>0.0000</b> | <b>0.0002</b> |
| IL-15                  | 1.17                | 2.26               | 1.94                | 0.6601                                                  | <b>0.0103</b> | <b>0.0235</b> |
| IL-17                  | 7.06                | 9.67               | 9.01                | 0.5367                                                  | 0.2055        | 0.5915        |
| CCL2/ MCP-1            | 49.16               | 160.36             | 161.93              | 0.7861                                                  | <b>0.0014</b> | <b>0.0000</b> |
| CCL3/ MIP-1 $\alpha$   | 8.65                | 28.61              | 29.41               | 1.0000                                                  | <b>0.0000</b> | <b>0.0000</b> |
| CCL4/ MIP-1 $\beta$    | 23.33               | 92.86              | 135.37              | 0.6431                                                  | <b>0.0005</b> | <b>0.0000</b> |
| CCL11/ Eotaxin         | 138.53              | 253.14             | 229.45              | 0.3149                                                  | <b>0.0000</b> | <b>0.0000</b> |
| CCL13/ MCP-4           | 12.35               | 13.00              | 12.88               | 1.0000                                                  | 0.4939        | 0.3527        |
| CCL17/ TARC            | 4.96                | 17.67              | 14.37               | 0.3462                                                  | 0.0543        | 0.2938        |
| CCL22/ MDC             | 115.93              | 157.02             | 158.61              | 1.0000                                                  | 0.3130        | 0.1788        |
| CCL26/ Eotaxin-3       | 30.91               | 44.17              | 38.45               | 1.0000                                                  | 0.4245        | 0.2513        |
| CXCL8/ IL-8            | 1880.12             | 2177.42            | 2326.43             | 1.0000                                                  | 1.0000        | 1.0000        |
| CXCL9/ MIG             | 212.28              | 561.13             | 525.16              | 0.1771                                                  | <b>0.0037</b> | 0.0625        |
| CXCL10/ IP-10          | 773.80              | 5215.96            | 4619.65             | 0.2013                                                  | <b>0.0000</b> | <b>0.0000</b> |
| CXCL11/ ITAC           | 11.65               | 126.69             | 64.50               | 0.1026                                                  | <b>0.0000</b> | <b>0.0010</b> |

HC=Healthy control; A=Asthma; NA=No Asthma

**Table E4 | Nasopharyngeal cytokines and chemokines measured within 24 hours of admission**

| Cytokine or chemokine | Median HC<br>(n=36) | Median A<br>(n=40) | Median NA<br>(n=93) | Dunn's test with Bonferroni correction; <i>P</i> -value |               |               |
|-----------------------|---------------------|--------------------|---------------------|---------------------------------------------------------|---------------|---------------|
|                       |                     |                    |                     | A vs NA                                                 | A vs HC       | NA vs HC      |
| IFN-α2a               | 1.31                | 1.31               | 1.31                | 0.2611                                                  | <b>0.0016</b> | <b>0.0000</b> |
| IFN-β                 | 11.67               | 11.67              | 11.67               | 1.0000                                                  | <b>0.0394</b> | <b>0.0386</b> |
| IFN-γ                 | 0.32                | 1.05               | 0.32                | 0.2193                                                  | 0.6190        | 0.8937        |
| IFN-λ (IL-29)         | 12.01               | 12.01              | 12.01               | 0.5483                                                  | <b>0.0000</b> | <b>0.0000</b> |
| TNF-α                 | 0.30                | 7.90               | 7.11                | 1.0000                                                  | <b>0.0000</b> | <b>0.0000</b> |
| GMCSF                 | 0.29                | 2.01               | 2.42                | 1.0000                                                  | <b>0.0000</b> | <b>0.0000</b> |
| IL-1β                 | 0.33                | 4.76               | 3.21                | 1.0000                                                  | <b>0.0000</b> | <b>0.0000</b> |
| IL-2                  | 0.58                | 5.27               | 10.08               | 0.6876                                                  | <b>0.0088</b> | <b>0.0001</b> |
| IL-4                  | 0.40                | 0.40               | 1.23                | 0.7800                                                  | 1.0000        | 0.9828        |
| IL-5                  | 0.30                | 0.90               | 0.78                | 1.0000                                                  | 0.6427        | 0.6659        |
| IL-6                  | 0.33                | 10.55              | 34.27               | 0.9277                                                  | <b>0.0000</b> | <b>0.0000</b> |
| IL-10                 | 0.28                | 0.80               | 0.61                | 1.0000                                                  | <b>0.0000</b> | <b>0.0000</b> |
| IL-12p70              | 0.29                | 1.39               | 1.13                | 1.0000                                                  | 0.2038        | 0.0796        |
| IL-13                 | 0.78                | 2.78               | 1.76                | 0.2548                                                  | <b>0.0000</b> | <b>0.0000</b> |
| IL-15                 | 0.31                | 0.66               | 0.47                | 1.0000                                                  | 1.0000        | 1.0000        |
| IL-17                 | 0.25                | 9.09               | 5.20                | 0.5273                                                  | <b>0.0000</b> | <b>0.0000</b> |
| CCL2/ MCP-1           | 1.70                | 66.62              | 123.56              | 1.0000                                                  | <b>0.0000</b> | <b>0.0000</b> |
| CCL3/ MIP-1α          | 1.37                | 28.04              | 26.42               | 1.0000                                                  | <b>0.0000</b> | <b>0.0000</b> |
| CCL4/ MIP-1β          | 5.25                | 279.03             | 135.08              | 0.8527                                                  | <b>0.0076</b> | <b>0.0001</b> |
| CCL11/ Eotaxin        | 14.98               | 850.31             | 536.97              | 1.0000                                                  | <b>0.0000</b> | <b>0.0000</b> |
| CCL13/ MCP-4          | 2.94                | 38.24              | 38.26               | 1.0000                                                  | <b>0.0000</b> | <b>0.0000</b> |
| CCL17/ TARC           | 4.96                | 47.84              | 29.73               | 0.5485                                                  | <b>0.0000</b> | <b>0.0000</b> |
| CCL22/ MDC            | 54.39               | 435.31             | 375.91              | 0.8612                                                  | <b>0.0000</b> | <b>0.0000</b> |
| CCL26/ Eotaxin-3      | 2.51                | 26.86              | 17.95               | 1.0000                                                  | <b>0.0000</b> | <b>0.0000</b> |
| CXCL8/ IL-8           | 10.40               | 2173.69            | 888.60              | 1.0000                                                  | <b>0.0000</b> | <b>0.0000</b> |
| CXCL9/ MIG            | 2.52                | 360.53             | 216.47              | 0.9507                                                  | <b>0.0000</b> | <b>0.0000</b> |
| CXCL10/ IP-10         | 11.98               | 9004.99            | 3389.03             | 0.7205                                                  | <b>0.0000</b> | <b>0.0000</b> |
| CXCL11/ ITAC          | 0.81                | 134.15             | 135.70              | 0.7444                                                  | <b>0.0000</b> | <b>0.0000</b> |

HC=Healthy control; A=Asthma; NA=No Asthma

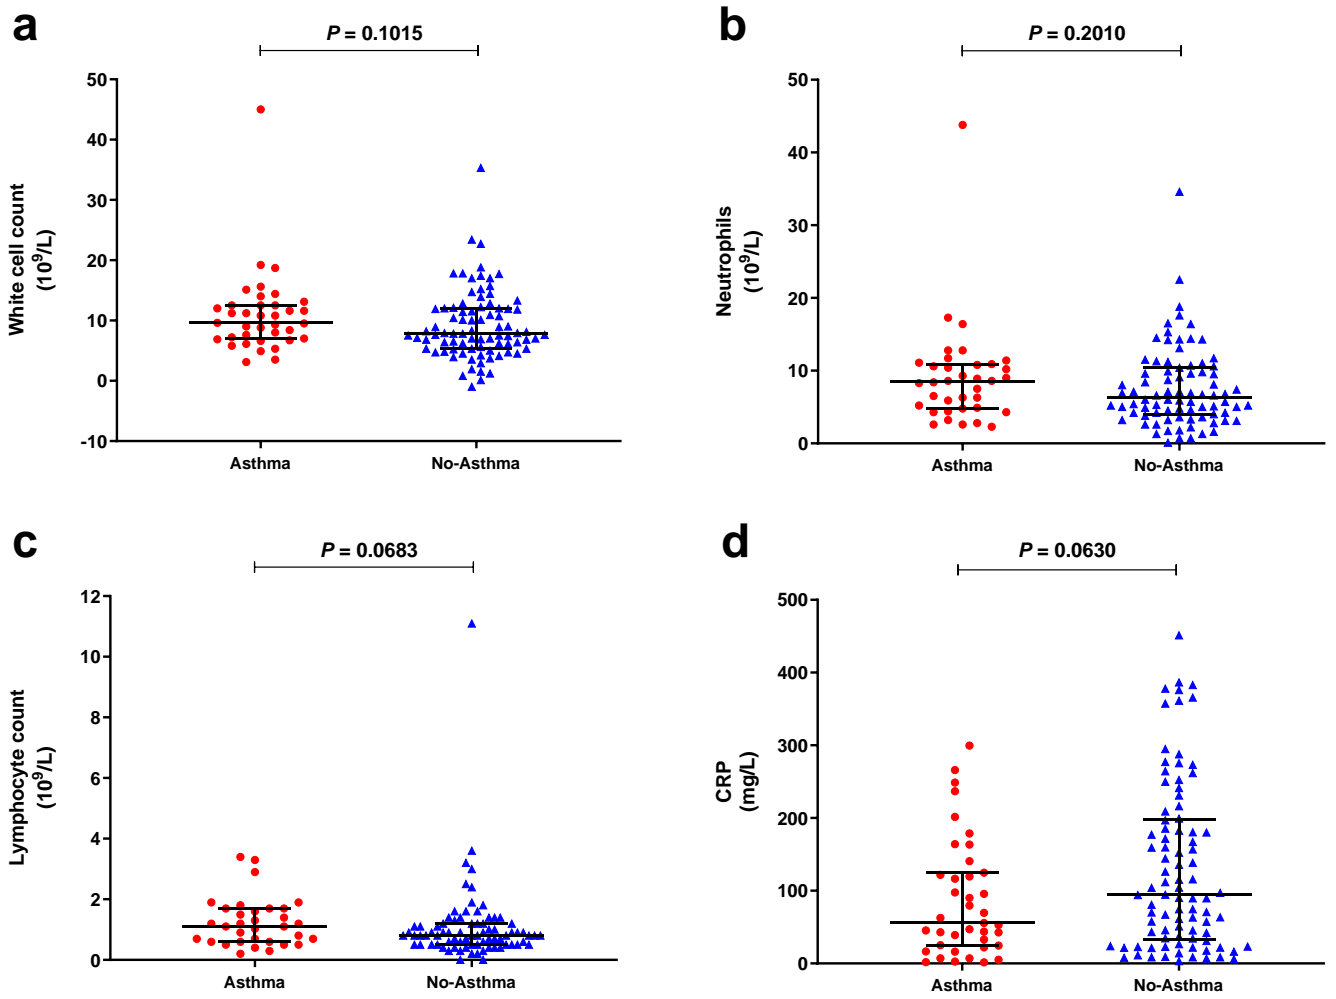

**Figure E1 | Serum white cell count differential and CRP levels in subjects with and without asthma**  
 Measured within 24 hours of admission in individual subjects: (a) white cell count (asthma  $n=37$ , no asthma  $n=84$ ), (b) neutrophils (asthma  $n=36$ , no asthma  $n=82$ ), (c) lymphocytes (asthma  $n=33$ , no asthma  $n=79$ ) and CRP (asthma  $n=37$ , no asthma  $n=90$ ). Horizontal bar represents the median and error bars the interquartile range. Statistical analysis performed using Mann-Whitney test.

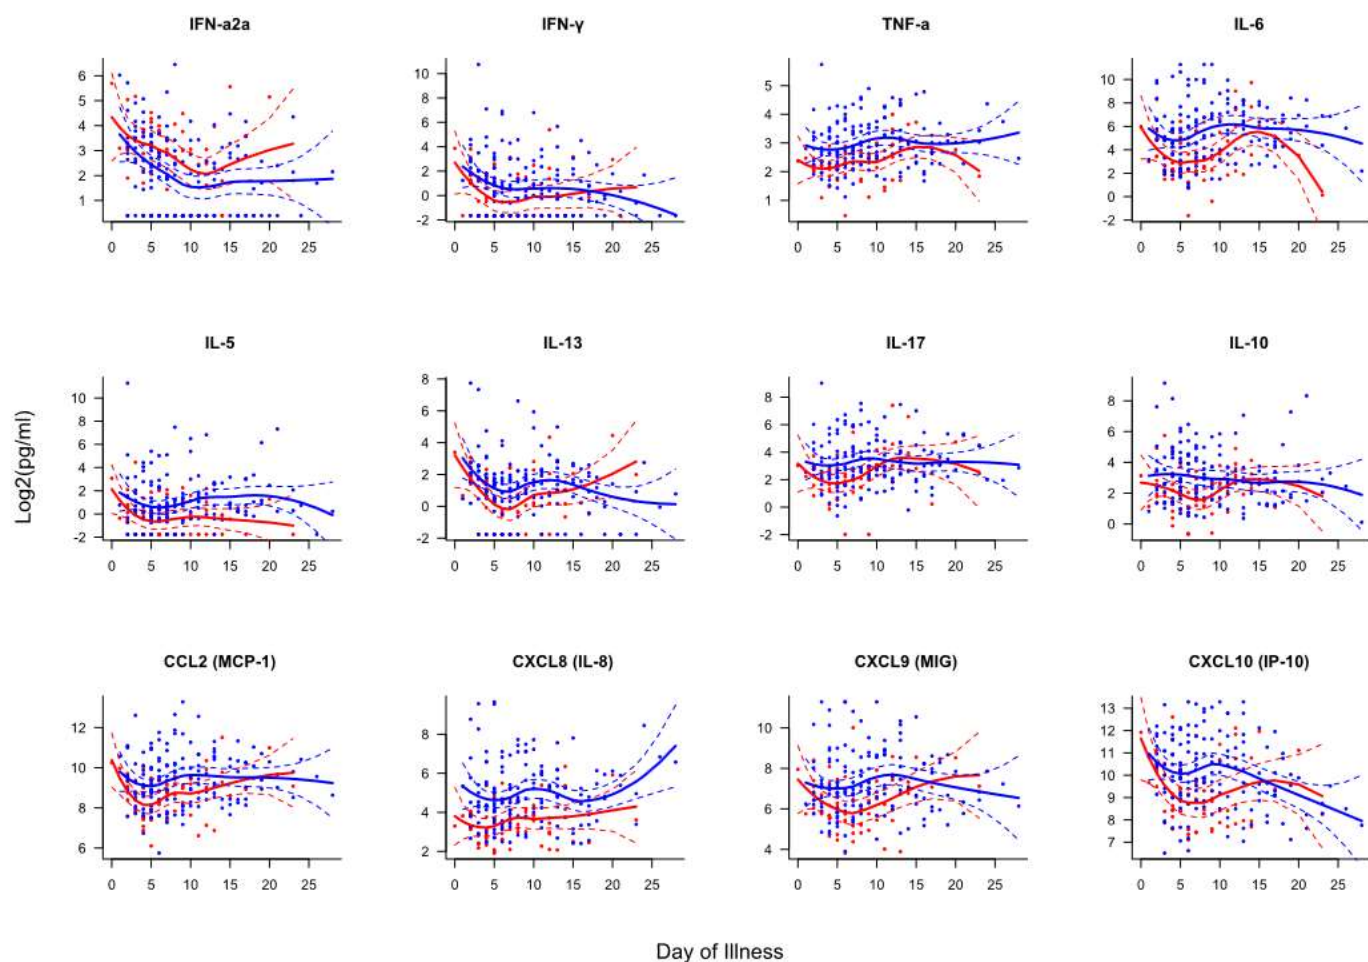

**Figure E2 | Scatterplots of serum mediators differentiated by day of illness (DOI)**

Dots represent individual samples up to two samples collected per subject. Red dots represent asthma (n=64), blue dots represent no asthma (n=155). First sample collected within 24 hours of admission and second sample between 48-72 hours of admission. DOI represents number of days elapsed between subject-reported symptom onset and time of sampling. Locally weighted scatterplot smoothing (LOESS) fits plotted in red for asthma samples and blue for non-asthma samples. Solid line represent LOESS fit and dashed lines the 95% CI.

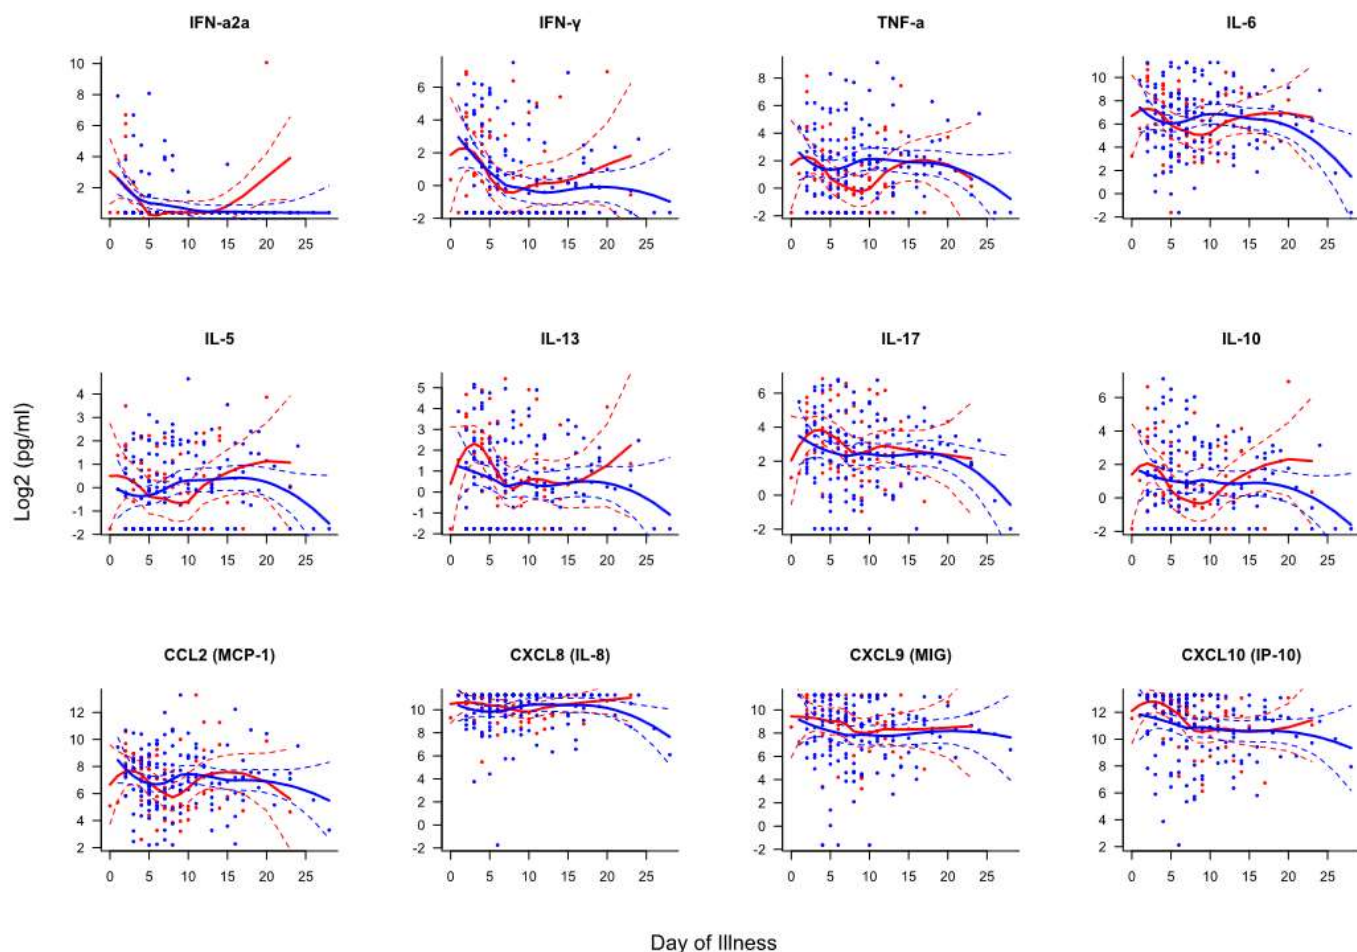

**Figure E3 | Scatterplots of nasal mediators differentiated by day of illness (DOI)**

Dots represent individual samples with up to two samples collected per subject. Red dots represent asthma (n=65), blue dots represent no asthma (n=153). First sample collected within 24 hours of admission and second sample between 48-72 hours of admission. DOI represents number of days elapsed between subject-reported symptom onset and time of sampling. Locally weighted scatterplot smoothing (LOESS) fits plotted in red for asthma samples and blue for non-asthma samples. Solid line represent LOESS fit and dashed lines the 95% CI



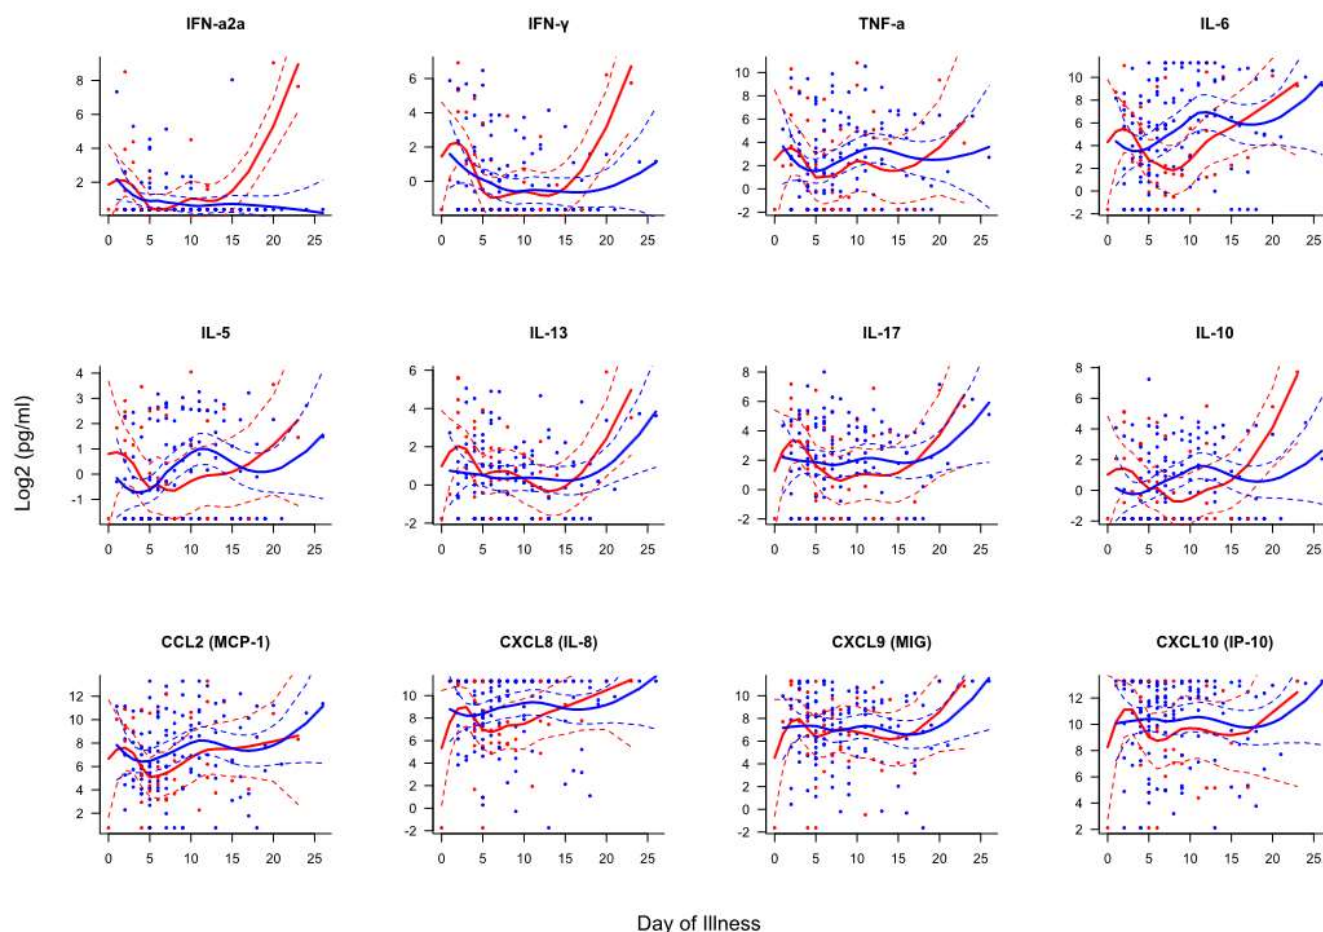

**Figure E4 | Scatterplots of nasopharyngeal mediators differentiated by day of illness (DOI)**

Dots represent individual samples up to two samples collected per subject. Red dots represent asthma (n=49), blue dots represent no asthma (n=123). First sample collected within 24 hours of admission and second sample between 48-72 hours of admission. Day of illness represents number of days elapsed between subject-reported symptom onset and time of sampling. Locally weighted scatterplot smoothing (LOESS) fits plotted in red for asthma samples and blue for non-asthma samples. Solid line represent LOESS fit and dashed lines the 95% CI

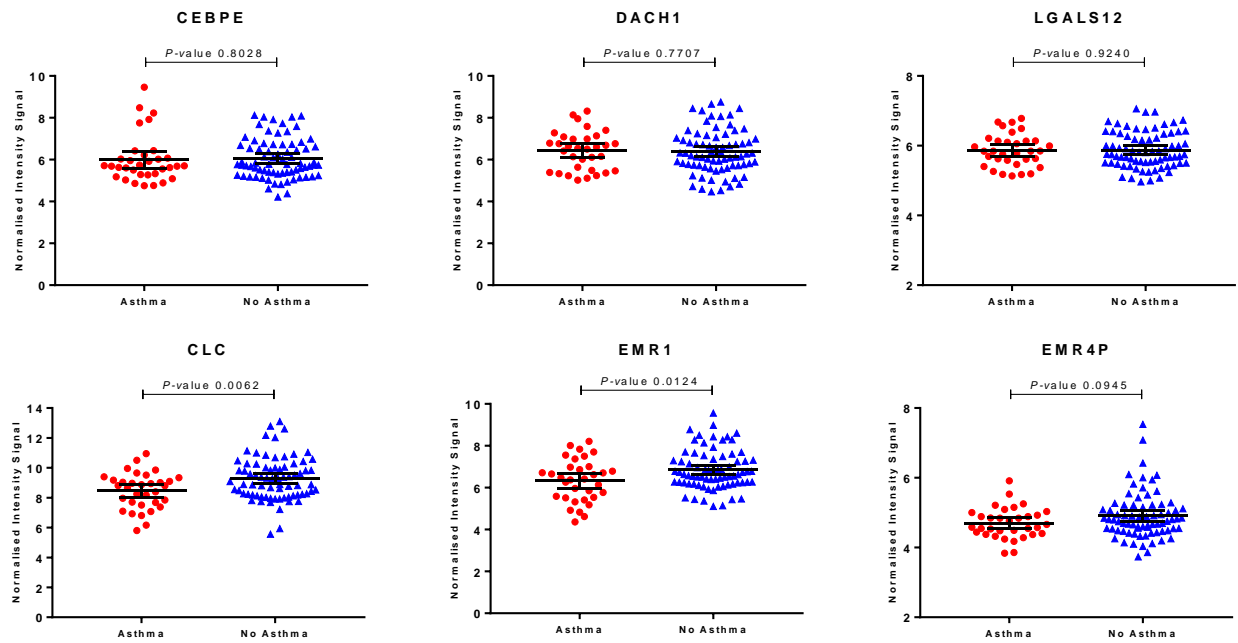

**Figure E5 | Expression of eosinophil associated genes in subjects with and without asthma** Whole blood samples were collected within 24 hours of admission for gene expression. RNA was extracted and analysed using Illumina microarray and the data normalized. Dots represent individual patients (asthma=33, no asthma=74) with horizontal bar representing the mean and error bars the 95% CI. Statistical analysis performed using unpaired t-test
