# Supplementary material
Source: HighWire-hosted journal article supplement (https://erj.ersjournals.com/content/54/4/1900949)
Supplement: inline-supplementary-material-2 [file inline-supplementary-material-2.pdf]

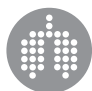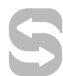

SHAREABLE PDF

# Patterns of systemic and local inflammation in patients with asthma hospitalised with influenza

Akhilesh Jha<sup>1,2</sup>, Jake Dunning<sup>1,3</sup>, Tanushree Tunstall<sup>1</sup>, Ryan S. Thwaites<sup>1</sup>, Long T. Hoang<sup>1</sup>, The MOSAIC Investigators<sup>4</sup>, Onn Min Kon <sup>1</sup>, Maria C. Zamboni<sup>3</sup>, Trevor T. Hansel<sup>1</sup> and Peter J. Openshaw<sup>1</sup>

**Affiliations:** <sup>1</sup>National Heart and Lung Institute, Imperial College London, St Mary's Campus, London, UK. <sup>2</sup>Dept of Medicine, University of Cambridge, Cambridge, UK. <sup>3</sup>Public Health England (formerly Health Protection Agency), London, UK. <sup>4</sup>MOSAIC consortium details can be found in the acknowledgements section.

**Correspondence:** Peter J. Openshaw, National Heart and Lung Institute, Imperial College London (St Mary's Campus), Norfolk Place, Paddington, London W2 1PG, UK. E-mail: p.openshaw@imperial.ac.uk

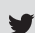

@ERSpublications

**Patients with asthma hospitalised with influenza are commonly female and lack classical type 2 nasal mucosal inflammation. They have good prognosis with enhanced type 1 interferon production and reduced systemic inflammation.** <http://bit.ly/2Ovzz7O>

**Cite this article as:** Jha A, Dunning J, Tunstall T, *et al.* Patterns of systemic and local inflammation in patients with asthma hospitalised with influenza. *Eur Respir J* 2019; 54: 1900949 [<https://doi.org/10.1183/13993003.00949-2019>].

This single-page version can be shared freely online.

## ABSTRACT

**Background:** Patients with asthma are at risk of hospitalisation with influenza, but the reasons for this predisposition are unknown.

**Study setting:** A prospective observational study of adults with PCR-confirmed influenza in 11 UK hospitals, measuring nasal, nasopharyngeal and systemic immune mediators and whole-blood gene expression.

**Results:** Of 133 admissions, 40 (30%) had previous asthma; these were more often female (70% *versus* 38.7%, OR 3.69, 95% CI 1.67–8.18;  $p=0.0012$ ), required less mechanical ventilation (15% *versus* 37.6%, Chi-squared 6.78;  $p=0.0338$ ) and had shorter hospital stays (mean 8.3 *versus* 15.3 days,  $p=0.0333$ ) than those without. In patients without asthma, severe outcomes were more frequent in those given corticosteroids (OR 2.63, 95% CI 1.02–6.96;  $p=0.0466$ ) or presenting >4 days after disease onset (OR 5.49, 95% CI 2.28–14.03;  $p=0.0002$ ). Influenza vaccination in at-risk groups (including asthma) were lower than intended by national policy and the early use of antiviral medications were less than optimal. Mucosal immune responses were equivalent between groups. Those with asthma had higher serum interferon (IFN)- $\alpha$ , but lower serum tumour necrosis factor, interleukin (IL)-5, IL-6, CXCL8, CXCL9, IL-10, IL-17 and CCL2 levels (all  $p<0.05$ ); both groups had similar serum IL-13, total IgE, periostin and blood eosinophil gene expression levels. Asthma diagnosis was unrelated to viral load, IFN- $\alpha$ , IFN- $\gamma$ , IL-5 or IL-13 levels.

**Conclusions:** Asthma is common in those hospitalised with influenza, but may not represent classical type 2-driven disease. Those admitted with influenza tend to be female with mild serum inflammatory responses, increased serum IFN- $\alpha$  levels and good clinical outcomes.
